# Supplementary material for: SERPINA5 promotes tumour cell proliferation by modulating the PI3K/AKT/mTOR signalling pathway in gastric cancer
Source: PubMed Central journal article supplement (PMC9465189; doi:10.1111/jcmm.17514), 2022-08-24
Supplement: JCMM-26-4837-s001.pdf [file JCMM-26-4837-s001.pdf]

# **SERPINA5 promotes tumor cell proliferation by modulating the PI3K/ATK/mTOR signaling pathway in gastric cancer**

Meiyang Fan<sup>1,2,3</sup>, Xiaofan Xiong<sup>4</sup>, Lin Han<sup>3</sup>, Lingyu Zhang<sup>2</sup>, Shanfeng Gao<sup>2</sup>, Liying Liu<sup>3</sup>, Xiaofei Wang<sup>3</sup>, Chen Huang<sup>3</sup>, Dongdong Tong<sup>2</sup>, Juan Yang<sup>2,3,\*</sup>, Lingyu Zhao<sup>2,3,\*</sup>, Yuan Shao<sup>1,\*</sup>

<sup>1</sup>Department of Otolaryngology & Head Neck, the First Affiliated Hospital of Xi'an Jiaotong University, Xi'an, 710061, P. R. China.

<sup>2</sup>Department of Cell Biology and Genetics, School of Basic Medical Sciences, Xi'an Jiaotong University Health Science Center, Xi'an 710061, P. R. China.

<sup>3</sup>Key Laboratory of Environment and Genes Related to Diseases (Xi'an Jiaotong University), Ministry of Education of China, Xi'an 710061, P. R. China.

<sup>4</sup>Department of Tumor and Immunology in precision medicine institute, Western China Science and Technology Innovation Port, Xi'an, 710004, P. R. China.

\*Correspondence: Yuan Shao (Email: [Shaxiaoying1976@163.com](mailto:Shaxiaoying1976@163.com))

\*Co-correspondence: Lingyu Zhao (Email: [zhaolingyu@xjtu.edu.cn](mailto:zhaolingyu@xjtu.edu.cn))

\*Co-correspondence: Juan Yang (Email: [yangjuan0112@xjtu.edu.cn](mailto:yangjuan0112@xjtu.edu.cn))

**Figure S1**

SERPINA5 has no impact on the migration of GC cells.

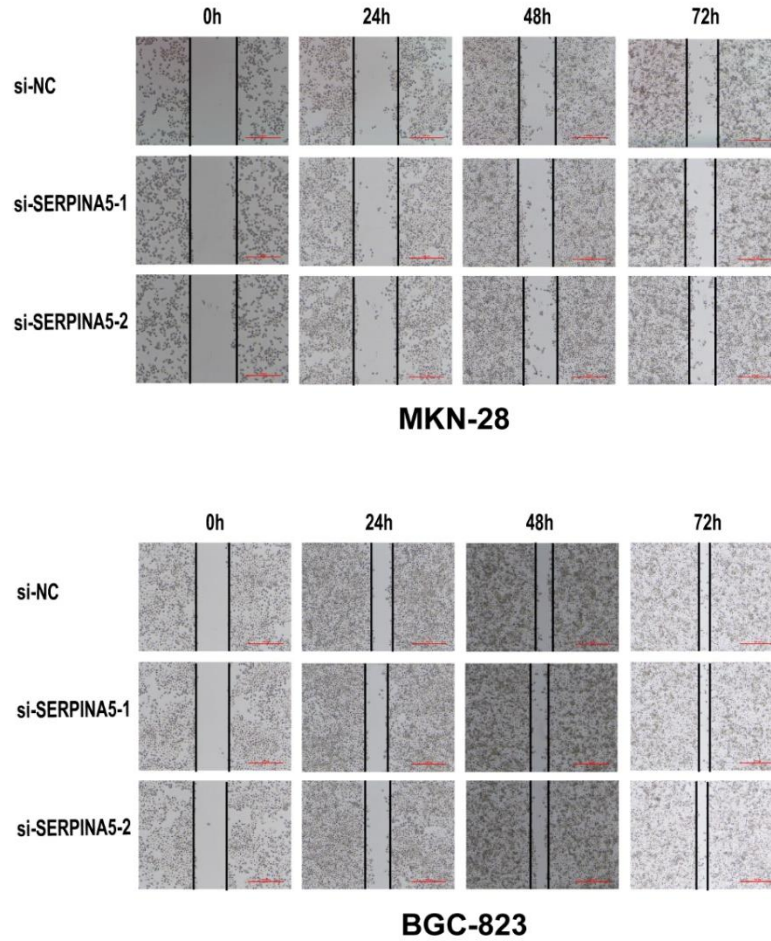

**Figure S2**

There has been the interaction between SERPINA5 and CBL by HitPredict.

| Interaction | Interactor | Experiments | Homologs | Category        | Interaction Score | Confidence |
|-------------|------------|-------------|----------|-----------------|-------------------|------------|
| 204430      | KLK3       | 2           | 15       | Small-scale     | 0.811             | High       |
| 169491      | UROK       | 2           | 20       | Small-scale     | 0.778             | High       |
| 190955      | PROC       | 2           | 20       | Small-scale     | 0.755             | High       |
| 204439      | HGFA       | 1           | 20       | High-throughput | 0.691             | High       |
| 169322      | THRB       | 1           | 20       | Small-scale     | 0.647             | High       |
| 169515      | TPA        | 1           | 20       | Small-scale     | 0.647             | High       |
| 189755      | FA11       | 1           | 20       | Small-scale     | 0.647             | High       |
| 189761      | KLKB1      | 1           | 13       | Small-scale     | 0.647             | High       |
| 204432      | ACRO       | 1           | 8        | Small-scale     | 0.647             | High       |
| 204434      | KLK2       | 1           | 14       | Small-scale     | 0.618             | High       |
| 204441      | EPS8       | 2           | 1        | High-throughput | 0.576             | High       |
| 204431      | FURIN      | 1           | 1        | High-throughput | 0.536             | High       |
| 204436      | CALX       | 1           | 1        | High-throughput | 0.536             | High       |
| 204443      | TGO1       | 1           | 6        | High-throughput | 0.536             | High       |
| 204435      | CBL        | 2           | 1        | High-throughput | 0.526             | High       |
| 204445      | CSN6       | 1           | 3        | High-throughput | 0.494             | High       |
| 204446      | PIAS4      | 1           | 1        | High-throughput | 0.494             | High       |
| 204449      | ZN363      | 1           | 1        | High-throughput | 0.494             | High       |
| 88813       | ZZEF1      | 1           | 1        | High-throughput | 0.489             | High       |
| 204444      | HECD3      | 1           | 1        | High-throughput | 0.489             | High       |
| 204450      | WVVOX      | 1           | 1        | High-throughput | 0.489             | High       |
| 204452      | FBX2       | 1           | 2        | High-throughput | 0.489             | High       |
| 204437      | BAP31      | 1           | 1        | High-throughput | 0.479             | High       |
| 204451      | BAP29      | 1           | 1        | High-throughput | 0.479             | High       |
| 204438      | RIDA       | 1           | 0        | High-throughput | 0.460             | High       |
| 72887       | PGRC2      | 1           | 0        | High-throughput | 0.458             | High       |
| 204442      | MSMO1      | 1           | 0        | High-throughput | 0.458             | High       |
| 204448      | MIA2       | 1           | 7        | High-throughput | 0.445             | High       |
| 123260      | SC22B      | 1           | 1        | High-throughput | 0.437             | High       |
| 204440      | EP300      | 1           | 1        | High-throughput | 0.417             | High       |
| 204447      | ESIP1      | 1           | 0        | High-throughput | 0.279             | Low        |
| 204433      | H15        | 1           | 0        | High-throughput | 0.249             | Low        |
